# Supplementary material for: Gut–Liver Immune Response and Gut Microbiota Profiling Reveal the Pathogenic Mechanisms of Vibrio harveyi in Pearl Gentian Grouper (Epinephelus lanceolatus ♂ × E. fuscoguttatus ♀)
Source: Front Immunol. 2020 Nov 26;11:607754. doi: 10.3389/fimmu.2020.607754 (PMC7727329; doi:10.3389/fimmu.2020.607754)
Supplement: Supplementary file 6 [file Table_2.doc]

**Table S2** Effective taqs and α-diversity.

| Sample name | Effective taqs(#) | observed_species | shannon | simpson | chao1 | ACE | goods_coverage | PD_whole_tree |
| --- | --- | --- | --- | --- | --- | --- | --- | --- |
| Group A | 70046±612A | 780±246A | 2.733±0.646A | 0.667±0.063A | 1043.440±304.743A | 1089.077±297.103A | 0.993±0.002A | 66.310±11.211A |
| Group B | 60338±8346A | 843±45A | 7.028±0.513B | 0.974±0.007B | 973.281±33.759A | 1025.285±31.635A | 0.996±0.000A | 91.048±19.108A |
| Group C | 61929±6479A | 1144±122A | 5.151±0.945AB | 0.844±0.082AB | 1370.698±89.510A | 1414.254±105.294A | 0.992±0.001A | 98.980±14.739A |

Note: The results of One-way ANOVA. Different letters (A, B) represent significant difference, and the same letters represent no significant difference.
